# Supplementary material
Source: PubMed Central journal article supplement (PMC3347400)
Supplement: supp_32.10.1830_MCB-MCB06374-11-s01.pdf [file supp_32.10.1830_MCB-MCB06374-11-s01.pdf]

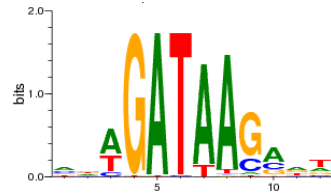

Badis G, Berger MF, Philippakis AA, Talukder S, Gehrke AR, Jaeger SA, Chan ET, Metzler G, Vedenko A, Chen X, Kuznetsov H, Wang CF, Coburn D, Newburger DE, Morris Q, Hughes TR, Bulyk ML  
**Diversity and complexity in DNA recognition by transcription factors.**  
 Science 324, 1720-3 (2009)

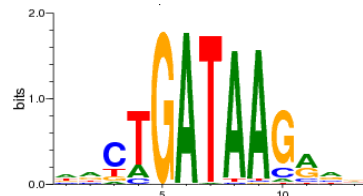

Badis G, Berger MF, Philippakis AA, Talukder S, Gehrke AR, Jaeger SA, Chan ET, Metzler G, Vedenko A, Chen X, Kuznetsov H, Wang CF, Coburn D, Newburger DE, Morris Q, Hughes TR, Bulyk ML  
**Diversity and complexity in DNA recognition by transcription factors.**  
 Science 324, 1720-3 (2009)

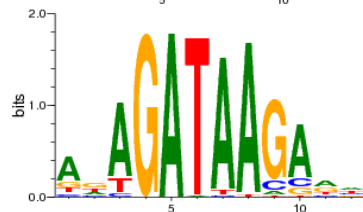

Badis G, Berger MF, Philippakis AA, Talukder S, Gehrke AR, Jaeger SA, Chan ET, Metzler G, Vedenko A, Chen X, Kuznetsov H, Wang CF, Coburn D, Newburger DE, Morris Q, Hughes TR, Bulyk ML  
**Diversity and complexity in DNA recognition by transcription factors.**  
 Science 324, 1720-3 (2009)

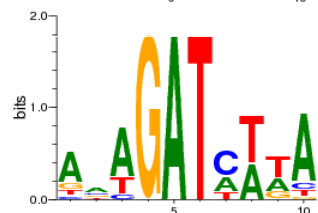

Ko LJ, Engel JD  
**DNA-binding specificities of the GATA transcription factor family.**  
 Mol Cell Biol 13, 4011-22 (1993)

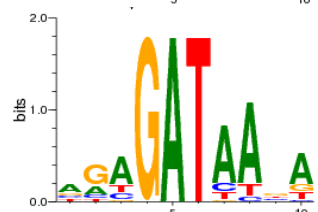

Ko LJ, Engel JD  
**DNA-binding specificities of the GATA transcription factor family.**  
 Mol Cell Biol 13, 4011-22 (1993)

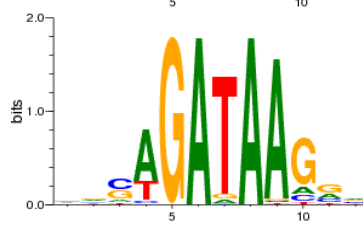

Fujiwara T, O'Geen H, Keles S, Blahnik K, Linnemann AK, Kang YA, Choi K, Farnham PJ, Bresnick EH  
**Discovering hematopoietic mechanisms through genome-wide analysis of GATA factor chromatin occupancy.**  
 Mol Cell 36, 667-81 (2009)

from MatBase by Genomatix

**Supplemental Figure 1. Position weight matrix plots of GATA binding motifs.** Experimentally generated GATA binding motif position weight matrices are represented in frequency bit score versus residue location plots. These matrix plots were taken from MatBase by genomatix. Primary source of binding site specificity data is cited in right panel adjacent to each plot.

A)

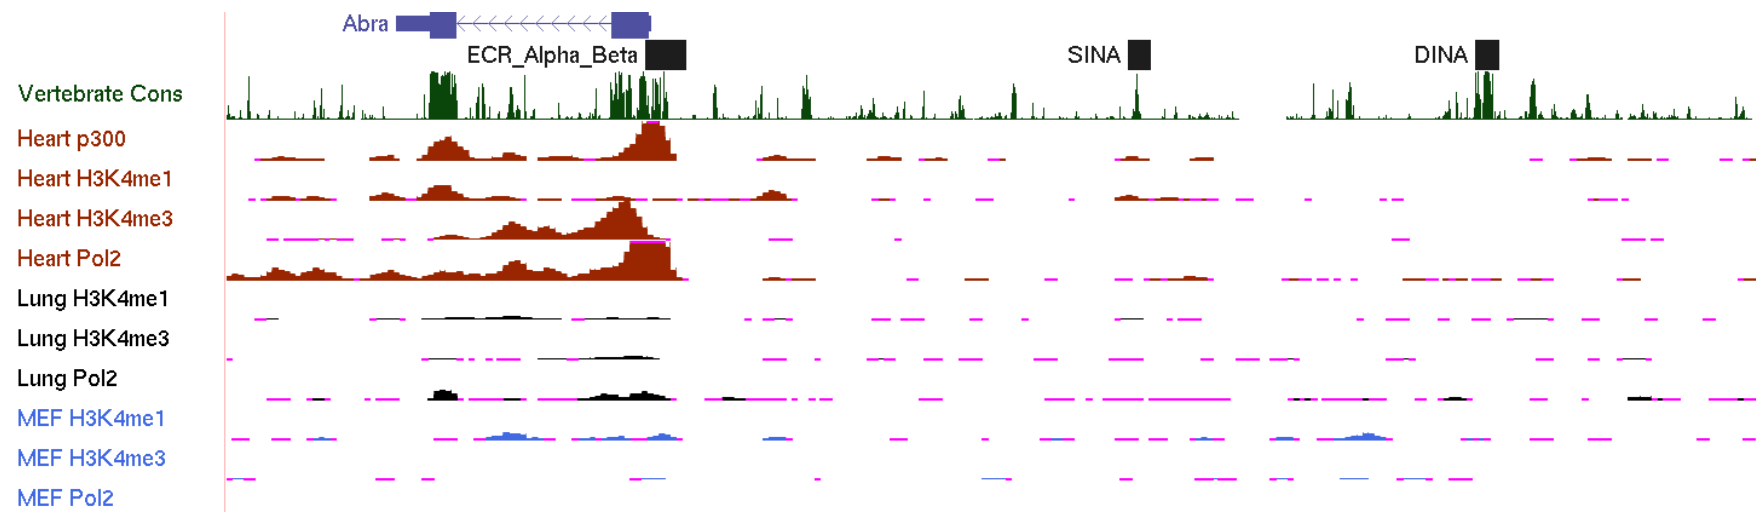

B)

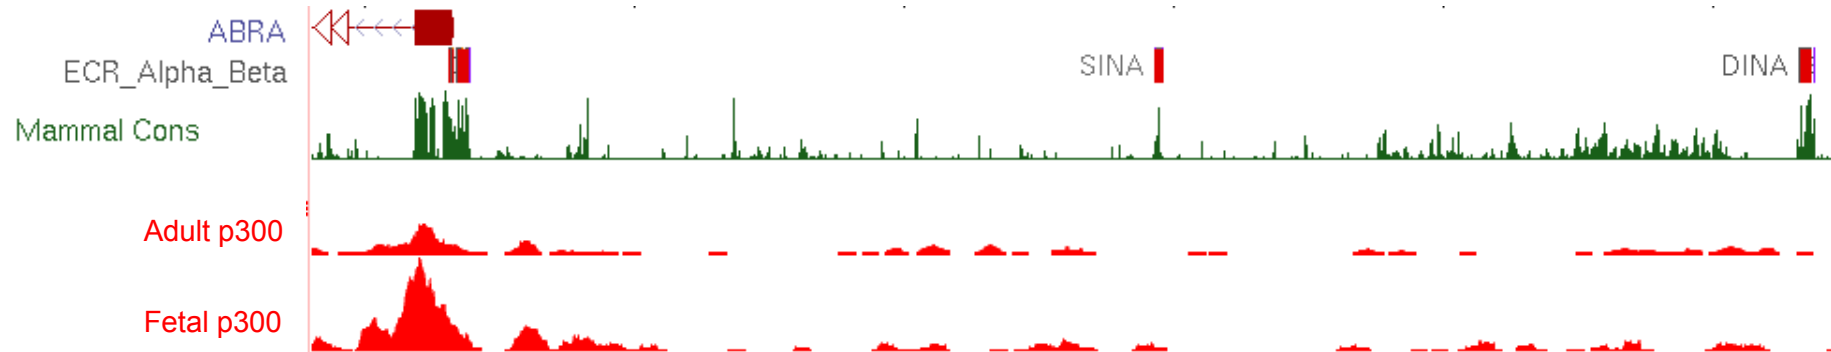

**Supplemental Figure 2. Occupancy of chromatin modifications and transcription co-factors in the mouse and human *ms1* locus.** Chromatin and transcription co-factor features in mouse 8 week adult heart, lung, mouse embryonic fibroblast (MEF) (A) and human fetal and adult human heart (B) are displayed for the mouse and human MS1 locus. The top track shows the annotated gene structure of mouse (A) and human (B) MS1 from Ensemble (A) and GENCODE (B) gene annotations. The second track shows the location of the mouse (A) and orthologous human (B) ECRs  $\alpha$ ,  $\beta$ , SINA and DINA (black horizontal boxes). The third track highlights sequence conservation using multispecies mammalian conservation plots from the UCSC genome browser. The densities of two histone modifications (H3K4me1 and H3K4me3), p300 and Pol2 are plotted as enrichment peaks isolated from respective tissues. ChIP-Seq data sets from mouse was obtained via the UCSC browser and encompassed within the freely available ENCODE data sets. Human fetal and adult heart p300/CBP ChIP-Seq can be freely downloaded from NCBI GEO database (GSE32587).

A)

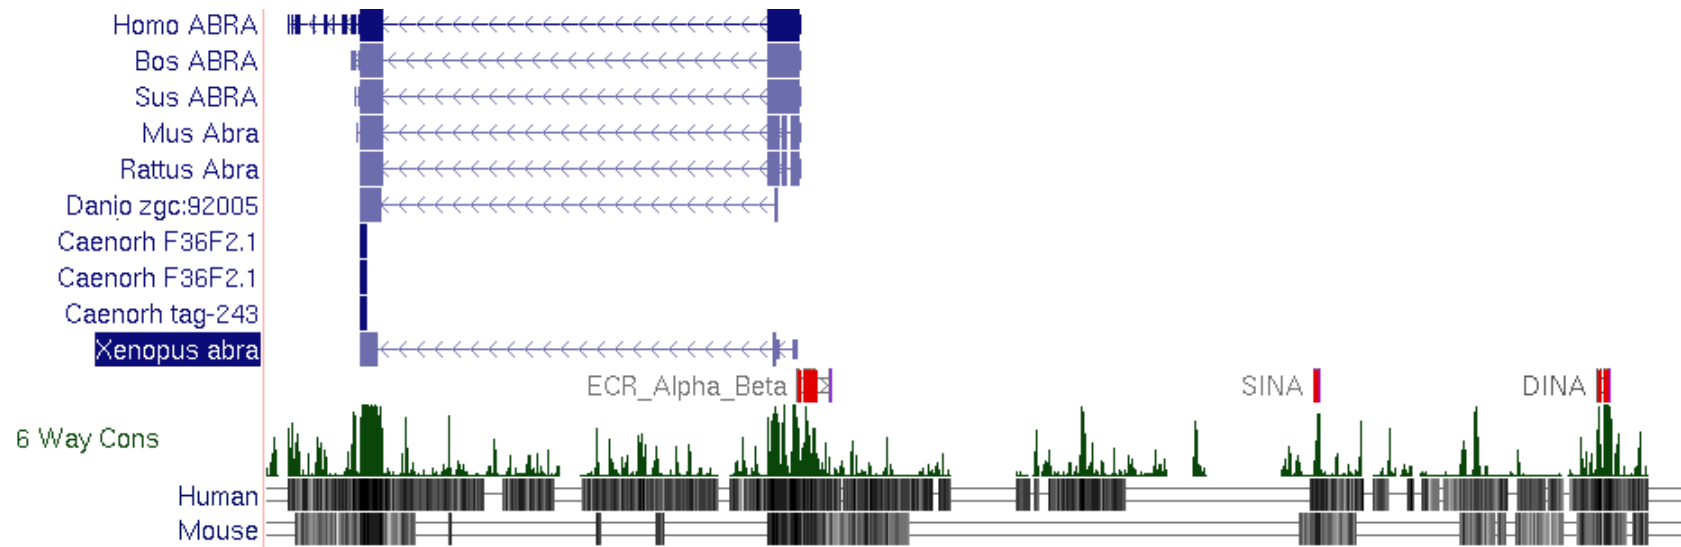

B)

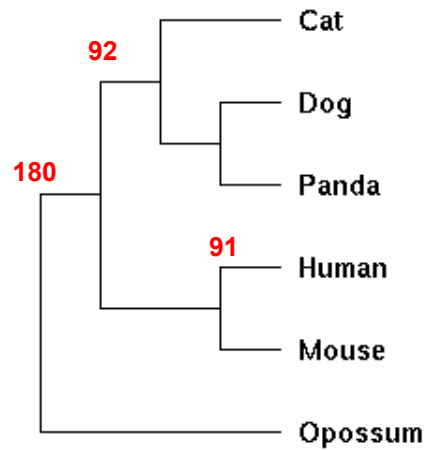

**Supplemental Figure 3. Comparative genomic analysis of the cat *ms1/STARS* gene.** Schematic of cat *ms1/STARS* locus with orthologous trans-mapped genes from other species in the top track. The second track shows mouse ECRs trans-mapped (via BLAT on UCSC browser) to the cat genome. The third track shows 6-way nucleotide sequence homology (MULAN alignment engine) plot of the ~30 kbp 5'-flanking region in cat, dog, panda, human, mouse and opossum. The bottom track specifically highlights orthologous regions of high sequence conservation in mouse and human (represented by vertical dashed lines, with strength of colour denoting percentage sequence identity) (A). Species used for 6-way nucleotide sequence and the evolutionary relationships between them are illustrated as a phylogenetic tree. Numbers indicate million years since sharing a last common ancestor for species linked at each branch point.

TABLE S1. *In silico* and experimental analysis supporting GATA4 binding site authenticity

| GATA site | Sequence | Evidence                                                                                       |
|-----------|----------|------------------------------------------------------------------------------------------------|
| 1         | tCTATt   | #Krejci et al .2004; GATA4 binding motif via EMSA and luciferase reporter assays in H9c2 cells |
| 2         | cATAGt   | “ “                                                                                            |
| 3         | aCATCt   | Matbase source matrix (Genomatrix Matinspector) – Supplementary Figure 1                       |
| 4         | tGATGa   | “ “                                                                                            |
| 5         | aTATCc   | “ “                                                                                            |
| 6         | cAATGt   | “ “                                                                                            |
| 7         | tAACTt   | “ “                                                                                            |
| 8         | cGATCa   | “ “                                                                                            |
| 9         | cCTAGt   | “ “                                                                                            |
| 10        | aGATAc   | “ “                                                                                            |
| 11        | aGATGt   | “ “                                                                                            |
| 12        | tTTAGc   | “ “                                                                                            |
| 13        | tTATCt   | “ “                                                                                            |

#Krejci A, et al. 2004. Multiple promoters drive tissue-specific expression of the human M muscarinic acetylcholine receptor gene. *J. Neurochem.* **91**: 88-98.

TABLE S2A. Primers used in rat *msl*-luciferase reporter studies

| Oligonucleotide name | Sense/Antisense | Sequence (5'-3')               |
|----------------------|-----------------|--------------------------------|
| MS1 (-1585)          | Sense           | TATTCAATGCTTAGTCCTGC           |
| MS1 (-1382)          | Sense           | CAACTGATTGATGAGCTTGTC          |
| MS1 (-1148)          | Sense           | GAGATATATGGGAGGTTGTAG          |
| MS1 (-365)           | Sense           | TTACAGAGGTTTAAGTGAGAGC         |
| MS1 (-300)           | Sense           | CGGAGCTCATGATTCAATCTAGTACTTTCC |
| MS1 (-127)           | Sense           | CGGAGCTCAGAACACCGTCAGAGCCATAGC |
| MS1 (+60)            | Antisense       | CCAAGCTTCAGGCTACCTGTTTCTTCTC   |
| MS1 (-16702)         | Sense           | CGCTCGAGGCCCCACGAGTTAAAGCTCA   |
| MS1 (-16432)         | Antisense       | TGGGCTGTGTGGGTTAGGAGA          |
| MS1 (-9498)          | Sense           | TTGCTATGGGTGGGGAAGTGG          |
| MS1 (-8608)          | Antisense       | GGCTCGAGGGGAAGGTTGGTCAGGAAAAGG |



TABLE S2B. Primers used in ChIP studies

| Oligonucleotide name | Sense/Antisense | Sequence (5'-3')               |
|----------------------|-----------------|--------------------------------|
| Cat B                | Sense           | CGGAGCTCAGAACACCGTCAGAGCCATAGC |
| Cat B                | Antisense       | CCAAGCTTCAGGCTACCTGTTTCTTCTC   |
| Cat A                | Sense           | CTCACCAAAGAATAAAGAAGACTAGC     |
| Cat A                | Antisense       | TAGAAGAGACAGATAACAGCTTCCT      |
| Cat C                | Sense           | GAGGGGTAAATATAATCACGATACA      |
| Cat C                | Antisense       | AGGAACTACAAGAAATTTAAATGC       |
| Cat D                | Sense           | GTGTTGGATGAAGCGGAGAG           |
| Cat D                | Antisense       | AACATGGTTTGCATAGCTGCA          |
| RMS1 ECR $\alpha$    | Sense           | CGGAGCTCAGAACACCGTCAGAGCCATAGC |
| RMS1 ECR $\alpha$    | Antisense       | CCAAGCTTCAGGCTACCTGTTTCTTCTC   |
| RMS1 ECR DINA        | Sense           | CTCACCAAAGAATAAAGAAGACTAGC     |
| RMS1 ECR DINA        | Antisense       | TAGAAGAGACAGATAACAGCTTCCT      |
| RMS1 Exon 2          | Sense           | GAGGGGTAAATATAATCACGATACA      |
| RMS1 Exon 2          | Antisense       | AGGAACTACAAGAAATTTAAATGC       |
| RNcx1 -50 GATA       | Sense           | GTGTTGGATGAAGCGGAGAG           |
| RNcx1 -50 GATA       | Antisense       | AACATGGTTTGCATAGCTGCA          |
| RMS1 ECR $\alpha$ /B | Sense           | CTTGCCAAGATGTGGTGCTA           |
| RMS1 ECR $\alpha$ /B | Antisense       | AGTGTCTTTGCCACCAGAG            |
| RMS1 ECR DINA/A      | Sense           | GAGAGGCTGCCTGAGAGCTA           |
| RMS1 ECR DINA/A      | Antisense       | TGCCAGGTTTAGCCATCTCT           |
| RNon-specific C      | Sense           | CCACCTCAGTGCCCTAACAT           |
| RNon-specific C      | Antisense       | TGCGATTGTCTCAGAGGATG           |
| mDINA/A              | Sense           | GGAAGCTGTGTGGGAAGGTA           |
| mDINA/A              | Antisense       | AGCCTCTCCAGTCTCCCTGT           |
| mAlpha/B             | Sense           | CCCTGACGGTGTCTGTTTT            |
| mAlpha/B             | Antisense       | ACTCTGGCACTTGGAGGAGA           |
| mSmarcd3             | Sense           | CCGCATTCTGCACTGATA             |
| mSmarcd3             | Antisense       | ACGCGGAGTGCACAGGAG             |
| mNegative/F          | Sense           | ATTTTGTGCTGCATAACCTCCT         |
| mNegative/F          | Antisense       | TAGCAACATCCTAAGCTGGACA         |
| mNon specific C      | Sense           | TAGTTGAAACGCGGCTACTG           |
| mNon specific C      | Antisense       | GAAACCAGCAGAGTGGAAGC           |

ECR, Evolutionary conserved region; DINA, Distal Intergenic Activator; ChIP, Chromatin immunoprecipitation ; R, rat ; m, mouse
